# Supplementary material for: Lung disease assessment in primary ciliary dyskinesia: a comparison between chest high-field magnetic resonance imaging and high-resolution computed tomography findings
Source: Springer Nature journal article supplement (doi:10.1186/1824-7288-35-24), 2009-08-06
Supplement: Additional file 1 [file 1824-7288-35-24-s1.doc]

**Additional file 1.** Cilia ultrastructure at EM and motion pattern at LM of the study population.

| Case no. | Ultrastructural defects at EM | | | | | LM ciliary motion pattern§ |
| --- | --- | --- | --- | --- | --- | --- |
| Dynein arm  abnormalities† | Peripheral  microtubule  abnormalities† | Central pair  abnormalities† | Compound cilia† | Basal bodies  abnormalities‡ |
| 1 | Absent inner arm (89%) | Outer doublets  disarranged (10%) | Absent central pair (15%)  Microtubule  translocation,  9 + 0 (20%) |  |  | Immotile |
| 2* | Absent inner arm (95%) |  |  | 20% |  | Immotile |
| 3 | Absent inner and outer arm (100%) |  |  | 10% |  | Immotile |
| 4* |  | Outer doublets  disarranged (5%) | Absent central pair (35%) | 8% |  | Motile (Metronome) |
| 5* | Absent inner arm (100%) |  |  |  |  | Immotile |
| 6 | Absent outer arm (100%) |  |  |  |  | Immotile |
| 7 | Partial inner and outer arm defect (100%) |  |  |  |  | Immotile |
| 8 | Absent outer arm (95%)  Short inner arm (60%) |  |  | 10% |  | Immotile |
| 9 | Absent inner and outer arm (100%) |  |  | 10% |  | Immotile |
| 10* | Absent inner and outer arm (95%) | Outer doublets disarranged (3%) | Microtubule  translocation,  9 + 0 (15%) | 5% |  | Immotile |
| 11* | Absent inner and outer arm (98%) |  | Microtubule  translocation,  9 + 0 (2%) |  |  | Immotile |
| 12 | Absent outer arm (95%)  Short inner arm (80%) | Outer doublets  disarranged (5%) |  |  |  | Immotile |
| 13 |  |  |  |  | 100% | Immotile |

*Cases with *situs solitus*.

† % cilia counted.

‡ Expressed as percentage of ciliated cells counted.

§ Ciliary beat frequency was < 7 Hz in all cases (normal range in our laboratory: 9,7-18,8 Hz).
